# Supplementary material for: Ethanolic Extracts of Adlay Testa and Hull and Their Active Biomolecules Exert Relaxing Effect on Uterine Muscle Contraction through Blocking Extracellular Calcium Influx in Ex Vivo and In Vivo Studies
Source: MDPI journal article supplement (doi:10.3390/biom11060887), 2021-06-15
Supplement: s1 [file s1]

# **Ethanolic extracts of adlay testa and hull and their active biomolecules exert relaxing effect on uterine muscle contraction through blocking extracellular calcium influx in ex vivo and in vivo studies**

Yun-Ju Huang<sup>1</sup>, Yu-Chieh Chen<sup>2</sup>, Hsin-Yuan Chen<sup>1</sup>, Yi-Fen Chiang<sup>1</sup>, Mohamed Ali<sup>3</sup>, Wenchang Chiang<sup>2</sup>, Cheng-Pei Chung<sup>4</sup>, Shih-Min Hsia<sup>1,5,6,7\*</sup>

<sup>1</sup> School of Nutrition and Health Sciences, College of Nutrition, Taipei Medical University, Taipei 11031, Taiwan; d04641004@ntu.edu.tw (Y.-J.H.); hsin246@gmail.com (H.-Y.C); yvonne840828@gmail.com (Y.-F.C.)

<sup>2</sup> Institute of Food Science and Technology, National Taiwan University, Taipei 10617, Taiwan; r00641033@ntu.edu.tw (Y.-C.C); chiang@ntu.edu.tw (W.C.)

<sup>3</sup> Clinical Pharmacy Department, Faculty of Pharmacy, Ain Shams University, 11566 Cairo, Egypt; mohamed.aboouf@pharma.asu.edu.eg (M.A.)

<sup>4</sup> Department of Nutrition and Health Sciences, Chang Gung University of Science and Technology, Taoyuan 33303, Taiwan.

<sup>5</sup> Graduate Institute of Metabolism and Obesity Sciences, College of Nutrition, Taipei Medical University, Taipei 11031, Taiwan.

<sup>6</sup> School of Food Safety, College of Nutrition, Taipei Medical University, Taipei 11031, Taiwan.

<sup>7</sup> Nutrition Research Center, Taipei Medical University Hospital, Taipei 11031, Taiwan

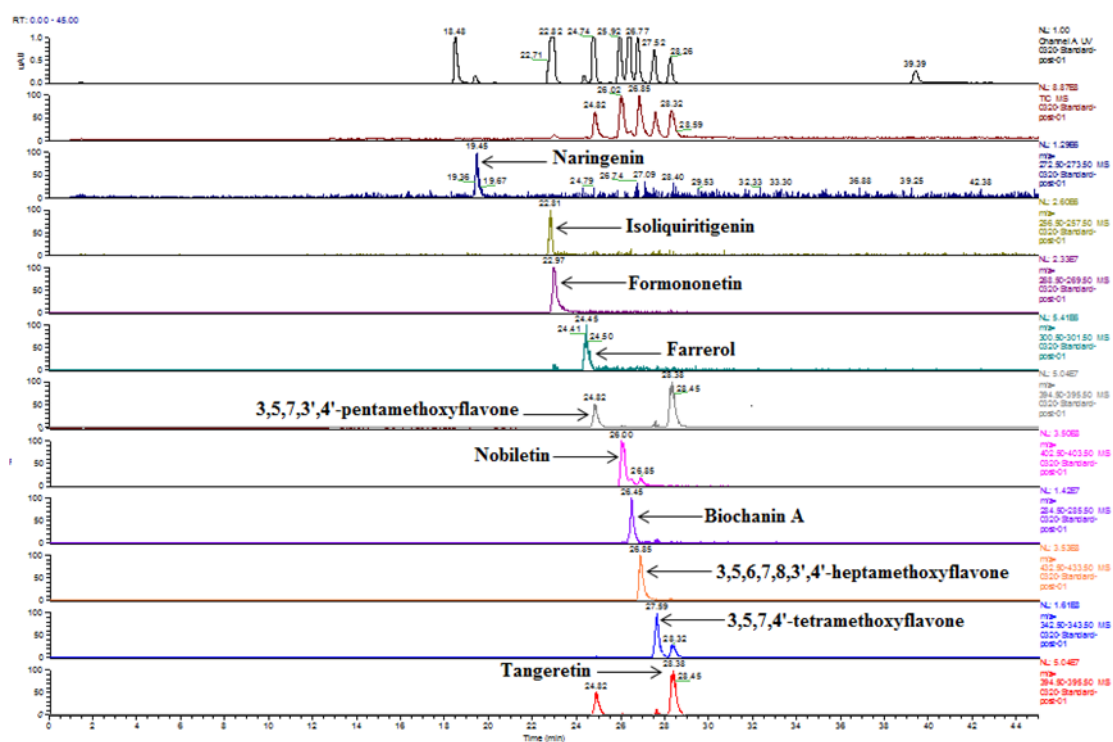

**Figure S1.** The chromatogram of the standard of flavonoids in positive model with the HPLC-ESI (+)/MS.

**Table S1.** The retention time, molecular weight and mass signal of the flavonoid compounds in AHE-EA and ATE-EA

| Compound                            | MW  | Retention time<br>(min) | Mass signal<br>(m/z)    |
|-------------------------------------|-----|-------------------------|-------------------------|
| Chrysoeriol                         | 300 | N.D.                    |                         |
| Formononetin                        | 268 | 22.97                   | 269 [M+H] <sup>+</sup>  |
| Biochanin A                         | 284 | 26.45                   | 285 [M+H] <sup>+</sup>  |
| 3,5,6,7,8,3',4'-heptamethoxyflavone | 432 | 26.85                   | 433 [M+H] <sup>+</sup>  |
| Farrerol                            | 300 | 24.45                   | 301 [M+H] <sup>+</sup>  |
| 3,5,7,4'-tetramethoxyflavone        | 342 | 27.59                   | 343 [M+H] <sup>+</sup>  |
| Isoliquiritigenin                   | 256 | 22.81                   | 257 [M+H] <sup>+</sup>  |
| 3,5,7,3',4'-pentamethoxyflavone     | 372 | 24.82                   | 395 [M+Na] <sup>+</sup> |
| Nobiletin                           | 402 | 26.00                   | 403 [M+H] <sup>+</sup>  |
| Homoeriodictyol                     | 302 | N.D.                    |                         |
| Tangeretin                          | 372 | 28.38                   | 395 [M+Na] <sup>+</sup> |
| Naringenin                          | 272 | 19.45                   | 273 [M+H] <sup>+</sup>  |
| Liquiritigenin                      | 256 | N.D.                    |                         |

N.D.: non-detection
